# Supplementary material
Source: Springer Nature journal article supplement (https://www.springermedizin.de/resource/supplementary/13075_2011_3523_MOESM1_ESM.pdf/9694702)

# Iizarov-type apparatus

1.3 MPa

Rings with  
cross pins

Springs

Rods

C9-10

C12-13

Loaded  
experimental disc

Unloaded  
control disc

← Proximal

Distal →

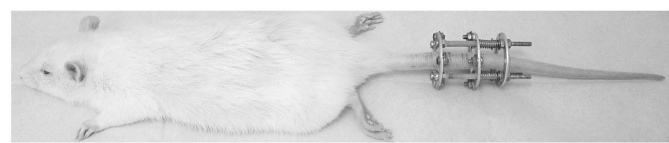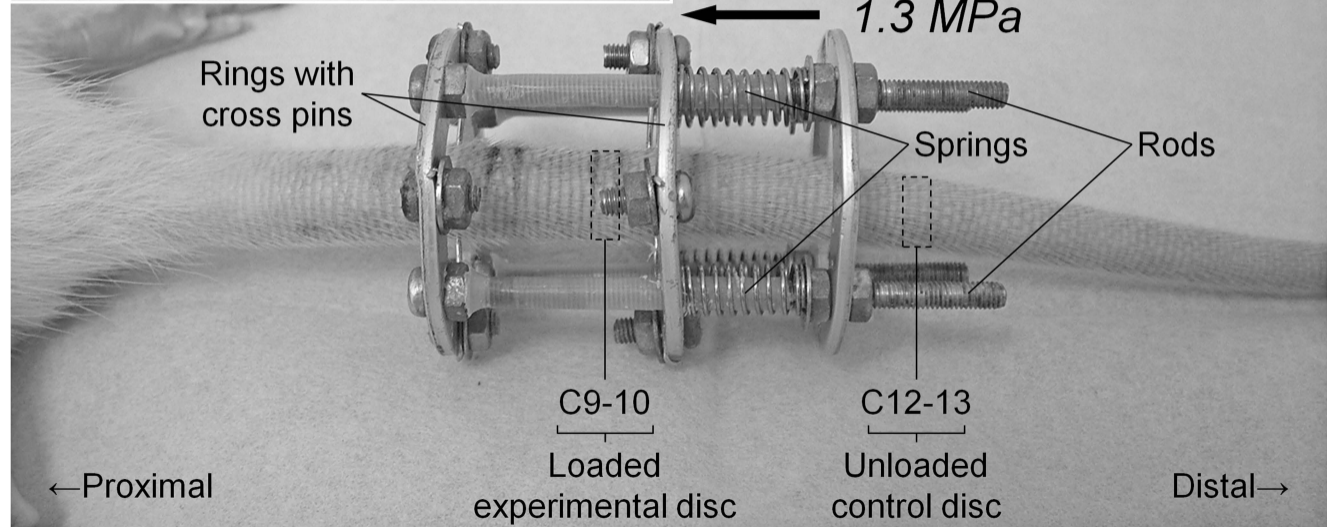

Supplement: MOESM1 [file 9694702]
